# Supplementary material
Source: Research Square preprint supplement (doi:10.21203/rs.3.rs-9543837/v1)
Supplement: Supplementary file 2 [file 7ad12f78c47dbc3cba77a971.docx]

**Reprogramming fucose metabolism in Kosakonia sp. CCTCC M2018092 for glucose-driven fucosylated human milk oligosaccharide biosynthesis**

Zhenghao Yina,b, Zhi Lia, Wei Maa, Jinkang Lia, Fulin Lia,b, Xingran Xua, Mingjin Yangc, Xiang Zoua,b*

aCollege of Pharmaceutical Sciences, Southwest University, Chongqing 400715, China

bNational Citrus Engineering Research Center, Chongqing 400700, China

cCollege of Engineering and Technology, Southwest University, Chongqing 400715, China

*Corresponding Author: Prof. Xiang Zou

College of Pharmaceutical Sciences, Southwest University 2 Tian Sheng Road, Beibei, Chongqing 400715, People’s Republic of China

Fax: +86-23-68251225

E-mail address: zhx1030@swu.edu.cn

**Supplementary Table 1. Glucose consumption reactions in GSMM**

| **Reaction ID** | **Equation** |
| --- | --- |
| GLCE | 1.00 glc__D [C_c] ⇌1.00 glc_D_B [C_c] |
| HEX1 | 1.00 atp [C_c] + 1.00 glc__D [C_c] → 1.00 adp [C_c] + 1.00 g6p [C_c] + 1.00 h [C_c] |
| XYL12 | 1.00 glc__D [C_c] ⇌1.00 fru [C_c] |
| GLCabc | 1.00 atp [C_c] + 1.00 h2o [C_c] + 1.00 glc__D [C_e] → 1.00 adp [C_c] + 1.00 glc__D [C_c] + 1.00 h [C_c] + 1.00 pi [C_c] |
| GLCpts | 1.00 pep [C_c] + 1.00 glc__D [C_e] → 1.00 g6p [C_c] + 1.00 pyr [C_c] |
| GLCtex | 1.00 glc__D [C_e] ⇌1.00 glc__D [C_p] |
| GLCDpp | 1.00 q8 [C_c] + 1.00 glc__D [C_p] + 1.00 h2o [C_p] → 1.00 q8h2 [C_c] + 1.00 glcn [C_p] + 1.00 h [C_p] |
| GLCabcpp | 1.00 atp [C_c] + 1.00 h2o [C_c] + 1.00 glc__D [C_p] → 1.00 adp [C_c] + 1.00 glc__D [C_c] + 1.00 h [C_c] + 1.00 pi [C_c] |
| GLCptspp | 1.00 pep [C_c] + 1.00 glc__D [C_p] → 1.00 g6p [C_c] + 1.00 pyr [C_c] |
| GLCt2pp | 1.00 glc__D [C_p] + 1.00 h [C_p] → 1.00 glc__D [C_c] + 1.00 h [C_c] |
| GLCADpts | 1.00 pep [C_c] + 1.00 glc__aD [C_e] → 1.00 pyr [C_c] + 1.00 g6p_A [C_c] |

**Supplementary Table 2. Strains and plasmids used in this study**

| **Strains or plasmids** | **Characteristics** | **Source** |
| --- | --- | --- |
| *Kosakonia* sp*.* CCTCC M2018092 | Wild type | 1 |
| *Escherichia coli* DH10B | A commonly used laboratory cloning strain | Preserved in laboratory |
| K01 | *Kosakonia* sp. Δ*wca*J | This study |
| K02 | *Kosakonia* sp. Δ*wca*JΔ*lac*Z | This study |
| K03 | *Kosakonia* sp. Δ*wca*JΔ*lac*Zcarrying pET-TM*fut*C，kan resistance | This study |
| K04 | *Kosakonia* sp. Δ*wca*JΔ*lac*ZΔ*pts*Gcarrying pET-TM*fut*C，kan resistance | This study |
| K05 | *Kosakonia* sp. Δ*wca*JΔ*lac*ZΔ*pts*GΔ*ccr* carrying pET-TM*fut*C，kan resistance | This study |
| K05 (PJ23) | *Kosakonia* sp. Δ*wca*JΔ*lac*ZΔ*pts*GΔ*ccr* carrying pET-JM*fut*C，kan resistance | This study |
| K06 | *Kosakonia* sp. Δ*wca*JΔ*lac*ZΔ*pts*GΔ*ccr*Δ*wca*H carrying pET-JM*fut*C，kan resistance | This study |
| K07 | *Kosakonia* sp. Δ*wca*JΔ*lac*ZΔ*pts*GΔ*ccr*Δ*gan*A carrying pET-JM*fut*C，kan resistance | This study |
| K08 | *Kosakonia* sp. Δ*wca*JΔ*lac*ZΔ*pts*GΔ*ccr*Δ*arc*A carrying pET-JM*fut*C，kan resistance | This study |
| K09 | *Kosakonia* sp. Δ*wca*JΔ*lac*ZΔ*pts*GΔ*ccr*Δ*edd* carrying pET-JM*fut*C，kan resistance | This study |
| K10 | *Kosakonia* sp. Δ*wca*JΔ*lac*ZΔ*pts*GΔ*ccr*Δ*pgm* carrying pET-JM*fut*C，kan resistance | This study |
| K11 | *Kosakonia* sp. Δ*wca*JΔ*lac*ZΔ*pts*GΔ*ccr*Δ*pfk*A carrying pET-JM*fut*C，kan resistance | This study |
| K12 | *Kosakonia* sp. Δ*wca*JΔ*lac*ZΔ*pts*GΔ*ccr*Δ*gan*AΔ*edd*Δ*pgm*Δ*pfk*A carrying pET-JM*fut*C，kan resistance | This study |
| K12 (MBP-105) | *Kosakonia* sp. Δ*wca*JΔ*lac*ZΔ*pts*GΔ*ccr*Δ*gan*AΔ*edd*Δ*pgm*Δ*pfk*A carrying pET-5M*fut*C，kan resistance | This study |
| K12 (MBP-108) | *Kosakonia* sp. Δ*wca*JΔ*lac*ZΔ*pts*GΔ*ccr*Δ*gan*AΔ*edd*Δ*pgm*Δ*pfk*A carrying pET-8M*fut*C，kan resistance | This study |
| K12 (Infb-105) | *Kosakonia* sp. Δ*wca*JΔ*lac*ZΔ*pts*GΔ*ccr*Δ*gan*AΔ*edd*Δ*pgm*Δ*pfk*A carrying pET-5b*fut*C，kan resistance | This study |
| K12 (Infb-108) | *Kosakonia* sp. Δ*wca*JΔ*lac*ZΔ*pts*GΔ*ccr*Δ*gan*AΔ*edd*Δ*pgm*Δ*pfk*A carrying pET-8b*fut*C，kan resistance | This study |
| K13 | *Kosakonia* sp. Δ*wca*JΔ*lac*ZΔ*pts*GΔ*ccr*Δ*gan*AΔ*edd*Δ*pgm*Δ*pfk*A-PJ23117-*glk* carrying pET-JM*fut*C，kan resistance | This study |
| K14 | *Kosakonia* sp. Δ*wca*JΔ*lac*ZΔ*pts*GΔ*ccr*Δ*gan*AΔ*edd*Δ*pgm*Δ*pfk*A-PJ23109-*glk* carrying pET-JM*fut*C，kan resistance | This study |
| K15 | *Kosakonia* sp. Δ*wca*JΔ*lac*ZΔ*pts*GΔ*ccr*Δ*gan*AΔ*edd*Δ*pgm*Δ*pfk*A carrying pET-JMZ*fut*C，kan resistance | This study |
| K16 | *Kosakonia* sp. Δ*wca*JΔ*lac*ZΔ*pts*GΔ*ccr*Δ*gan*AΔ*edd*Δ*pgm*Δ*pfk*AΔ*gcd* carrying pET-JM*fut*C，kan resistance | This study |
| K17 | *Kosakonia* sp. Δ*wca*JΔ*lac*ZΔ*pts*GΔ*ccr*Δ*gan*AΔ*edd*Δ*pgm*Δ*pfk*AΔ*glt*A carrying pET-JM*fut*C，kan resistance | This study |
| K18 | *Kosakonia* sp. Δ*wca*JΔ*lac*ZΔ*pts*GΔ*ccr*Δ*gan*AΔ*edd*Δ*pgm*Δ*pfk*AΔ*gcd*Δ*glt*A-PJ23109-*glk* carrying pET-JM*fut*C，kan resistance | This study |
| K19 | *Kosakonia* sp. Δ*wca*JΔ*lac*ZΔ*pts*GΔ*ccr*Δ*gan*AΔ*edd*Δ*pgm*Δ*pfk*AΔ*gcd-*Δ*glt*A-PJ23109-  *glk* carrying pET-8b*fut*C，kan resistance | This study |
| K20 | *Kosakonia* sp. Δ*wca*JΔ*lac*ZΔ*pts*GΔ*ccr*Δ*gan*AΔ*edd*Δ*pgm*Δ*pfk*AΔ*gcd-*P*fli*C-*glt*A-PJ23109-  *glk* carrying pET-8b*fut*C，kan resistance | This study |
| K21 | *Kosakonia* sp. Δ*wca*JΔ*lac*ZΔ*pts*GΔ*ccr*Δ*gan*AΔ*edd*Δ*pgm*Δ*pfk*AΔ*gcd-*P*fli*C-*glt*A-PJ23109-  *glk* carrying pET-8b*fut*A，kan resistance | This study |
| pET-TM*fut*C | pET28a-Ptac-MBP-*fut*C-*lac*Ygene，kan resistance | This study |
| pET-JM*fut*C | pET28a-PJ23114-MBP-*fut*C-PJ23115-*lac*Ygene，kan resistance | This study |
| pET-JMZ*fut*C | pET28a-PJ23114-MBP-*fut*C-PJ23115-*lac*Y-PJ23114-*zwf* gene，kan resistance | This study |
| pET-5M*fut*C | pET28a-PJ23105-MBP-*fut*C-PJ23115-*lac*Ygene，kan resistance | This study |
| pET-8M*fut*C | pET28a-PJ23108-MBP-*fut*C-PJ23115-*lac*Ygene，kan resistance | This study |
| pET-5b*fut*C | pET28a-PJ23105-Infb-*fut*C-PJ23115-*lac*Ygene，kan resistance | This study |
| pET-8b*fut*C | pET28a-PJ23108-Infb-*fut*C-PJ23115-*lac*Ygene，kan resistance | This study |
| pET-8M*fut*A | pET28a-PJ23108-MBP-*fut*A-PJ23115-*lac*Ygene，kan resistance | This study |

1. Niu S, Ma W, Jin M, Chen J, Li S, Zou X. Complete genome sequence of *Kosakonia* sp. strain CCTCC M2018092, a fucose-rich exopolysaccharide producer. *Microbiol. Resour. Announce*. 8, e00567–e00619 (2019).

**Supplementary Table 3. Primers used in this study**

| **Primers** | **Sequence（5´-3´）** |
| --- | --- |
| Δ*wca*J-LA-F | cgagtcggtgctttttttgagatctgaattaccagcggcacaaagttattcg |
| Δ*wca*J-LA-R | gtcaacaaagcggcgtattaagga |
| Δ*wca*J-RA-F | taatacgccgctttgttgactcgctgcacgatagagattaacg |
| Δ*wca*J-RA-R | gtagggataacagggtaatagatctaagctacctcaaaccgctgaaactgg |
| Δ*lac*Z-LA-F | cgagtcggtgctttttttgagatctgaattctgcatcgcgctgataacctt |
| Δ*lac*Z-LA-R | cgctccagcacgtcataaaaca |
| Δ*lac*Z-RA-F | ttttatgacgtgctggagcgtgacgcgtatcacaggatggaa |
| Δ*lac*Z-RA-R | gtagggataacagggtaatagatctaagcttccgtattcaaaacggttcgca |
| Δ*pts*G-LA-F | cgagtcggtgctttttttgagatctgaattaccgggatgatttctatgctg |
| Δ*pts*G-LA-R | tgcaggtctccgtaatcagca |
| Δ*pts*G-RA-F | tgctgattacggagacctgcagtgcgctgggtgtgattattctc |
| Δ*pts*G-RA-R | gtagggataacagggtaatagatctaagctgaagtacactgtcgcgctgg |
| Δ*crr*-LA-F | cgagtcggtgctttttttgagatctgaatttgaactggcgaagctgaaagatc |
| Δ*crr*-LA-R | gatcttctcctaagcagtaatttgggc |
| Δ*crr*-RA-F | cccaaattactgcttaggagaagatcgcgctctacagtctaaaaaaaatggc |
| Δ*crr*-RA-R | gtagggataacagggtaatagatctaagctcggtaattgtcgccatcatttgcg |
| Δ*wca*H-LA-F | cgagtcggtgctttttttgagatctgaattgctgaccattttctccagccg |
| Δ*wca*H-LA-R | ccgcgcctatttcctcgacg |
| Δ*wca*H-RA-F | cgtcgaggaaataggcgcggccgtggcaaaatcttcatgactt |
| Δ*wca*H-RA-R | gtagggataacagggtaatagatctaagctgctgaacctgttagatgccgc |
| Δ*gan*A-LA-F | cgagtcggtgctttttttgagatctgaattgcaggccaatatggatgacat |
| Δ*gan*A-LA-R | gggtagctgtcccaggagataaagtcgatctattcattcctgaaatttacaacacga |
| Δ*gan*A-RA-F | gatcgactttatctcctgggaca |
| Δ*gan*A-RA-R | gtagggataacagggtaatagatctaagcttctgctggtcgaagataatcgc |
| Δ*arc*A-LA-F | cgagtcggtgctttttttgagatctgaattagatgttaacagaacgggcatat |
| Δ*arc*A-LA-R | gtttgctacctaaattgccaactaaatcg |
| Δ*arc*A-RA-F | tcgatttagttggcaatttaggtagcaaacttcagtcgcgtgctgagc |
| Δ*arc*A-RA-R | gtagggataacagggtaatagatctaagcttactgctgcttgatgcggt |
| Δ*edd*-LA-F | cgagtcggtgctttttttgagatctgaattctcactgctgacagtattcgcga |
| Δ*edd*-LA-R | tcgcgtgaacgttcaataatgcg |
| Δ*edd*-RA-F | cgcattattgaacgttcacgcgaggatcgtgattgcgtggtagtg |
| Δ*edd*-RA-R | gtagggataacagggtaatagatctaagctgagagataccgccagtcggg |
| Δ*pgm*-LA-F | cgagtcggtgctttttttgagatctgaattagcattactctgagttttgccgc |
| Δ*pgm*-LA-R | tgcttcgtccttttaatgcaagg |
| Δ*pgm*-RA-F | ccttgcattaaaaggacgaagcagacaccaacgtcaccaaagtg |
| Δ*pgm*-RA-R | gtagggataacagggtaatagatctaagcttcgtgcagaccatcaacaaacca |
| Δ*pfk*A-LA-F | cgagtcggtgctttttttgagatctgaattctgggtatcggcggctatatctt |
| Δ*pfk*A-LA-R | cgatggagatacgctggtgtgagactacctctgaacttaggaatgca |
| Δ*pfk*A-RA-F | tcacaccagcgtatctccatcg |
| Δ*pfk*A-RA-R | gtagggataacagggtaatagatctaagctgtcaattttgatgacaccagcctgc |
| Δ*gcd*-LA-F | cgagtcggtgctttttttgagatctgaattcactcaacgattatgcaatccgc |
| Δ*gcd*-LA-R | gatcgtcgtcagcattatcaatagc |
| Δ*gcd*-RA-F | gctattgataatgctgacgacgatctgattacatcgtggcgtttgctc |
| Δ*gcd*-RA-R | gtagggataacagggtaatagatctaagctgctctatgtcatcgccagcgac |
| Δ*glt*A-LA-F | cgagtcggtgctttttttgagatctgaattcagccaaaatccataaacatgtggc |
| Δ*glt*A-LA-R | aggtgatggttgctttcttatcagc |
| Δ*glt*A-RA-F | ataagaaagcaaccatcacctgcgtcagctctataccggttac |
| Δ*glt*A-RA-R | gtagggataacagggtaatagatctaagctggcgggtgagatacccgaaac |
| q-rpoA-F | cggtgagagttcagggtaaagatg |
| q-rpoA-R | gtcaggtggcagatcacatgc |
| q-k-*man*B-F | gtatcgaagtgaccgccagc |
| q-k-*man*B-R | gtgttgatgtagccaagcagatgg |
| q-k-*man*C-F | ctatcgactacgcggtgatgg |
| q-k-*man*C-R | cggattcggcatagacgtagc |
| q-k-*gmd*-F | cgttgcggtctccttcgaatc |
| q-k-*gmd*-R | caggccatacagctcagaggtg |
| q-k-*fcl*-F | gaccaggtctacctggcagc |
| q-k-*fcl*-R | caggacgaaccgaggaacaacag |
| q-s-*man*B-F | cgcgacctcatatctgaagctc |
| q-s-*man*B-R | cattaagaccgctttcgcagc |
| q-s-*man*C-F | gctgaagctgtcgtcgtacc |
| q-s-*man*C-R | gattatctatccctaccgctgccac |
| q-s-*gmd*-F | cctgacgactacgtgattgctac |
| q-s-*gmd*-R | gaagtaacgcgggtcaacagagac |
| q-s-*fcl*-F | ctgttattcctcggatcgtcatgc |
| q-s-*fcl*-R | caggttggtcggcattacagag |

**Figures legends**

**Supplementary** **Figure 1** Viscosity differences in fermentation broths between the ΔwcaJ mutant strain and the wild-type strain

**Supplementary Figure 2** The protein expression of FutC at different temperatures

**Supplementary Figure 3** Optimization of initial carbon-to-nitrogen (C/N) ratio in a 5-L fermenter. **a.** Batch fermentation under the initial C/N ratio of 12:1. **b.** Batch fermentation under the initial C/N ratio of 6:1. **c.** Batch fermentation under the initial C/N ratio of 3:1. All data were derived from three independent samples.

**Supplementary Figure 4** Optimization of fed-batch fermentation in a 5L bioreactor. a. Fed-batch fermentation for2′-FL production by the K12 at low glucose concentration. b. Fed-batch fermentation for 2′-FL production by the K12 at high glucose concentration. c. Fed-batch fermentation for2′-FL production by the K16 at high glucose concentration. All data were derived from three independent samples.

**Supplementary Figure 5** HPLC analysis and MS identification of 3-FL in fermentation brotha. HPLC analysis of 3-FL standard and fermentation broth sample. b. MS identification of 3-FL standard. c. MS identification of 3-FL in fermentation broth.

**
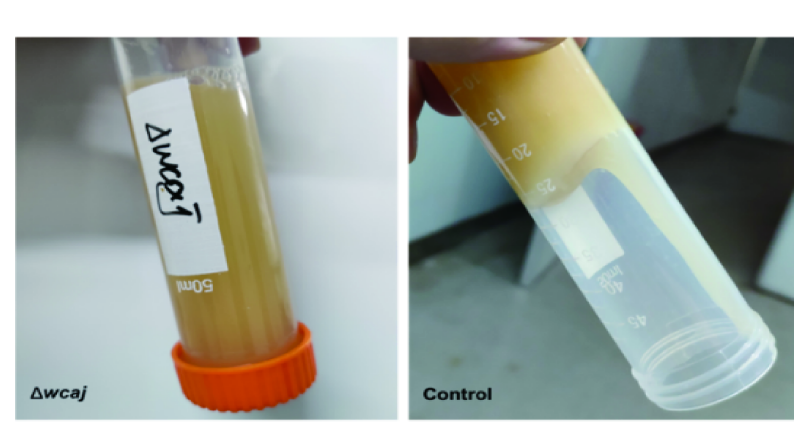
**

**Supplementary** **Fig. 1**


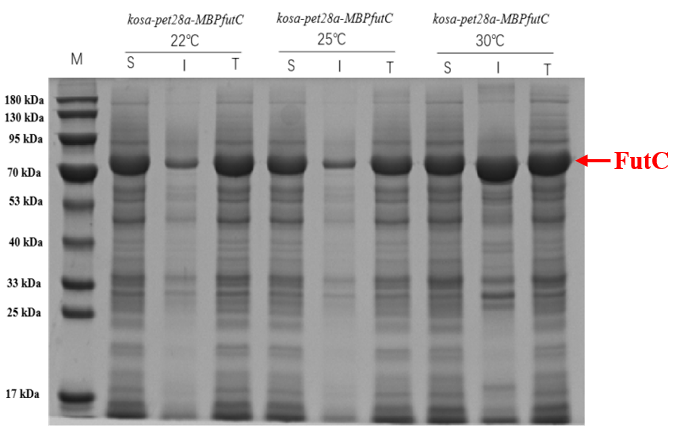


**Supplementary Fig. 2**


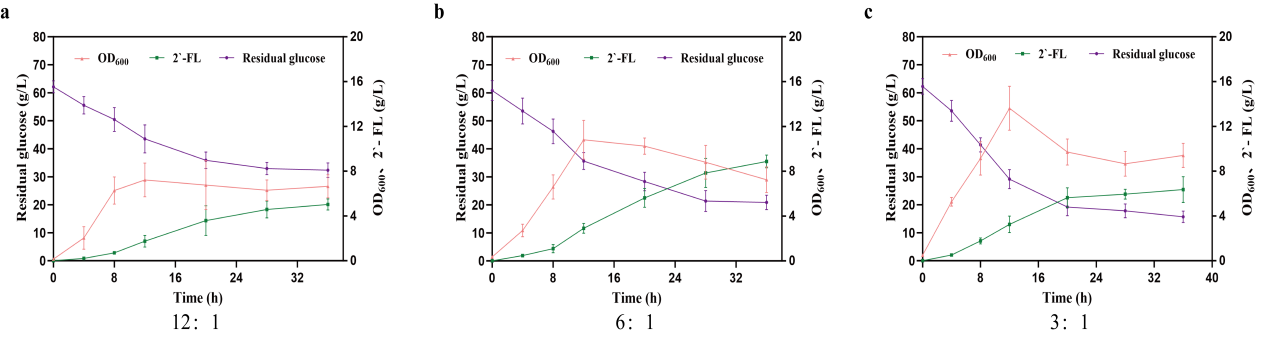


**Supplementary Fig.3**

**
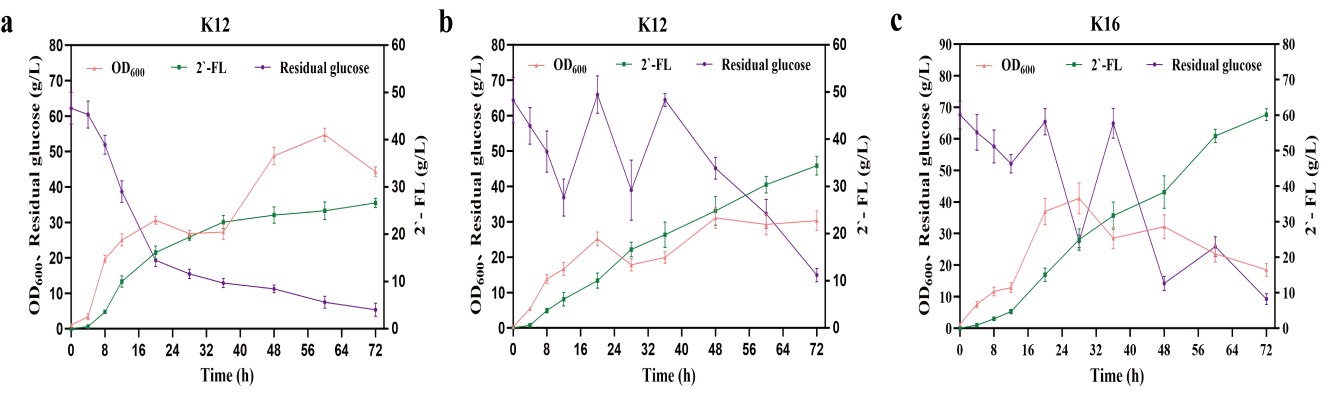
**

**Supplementary Fig.4**


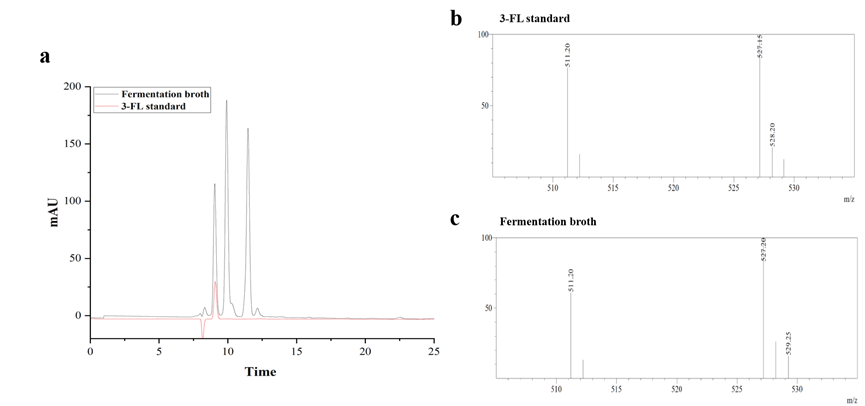


**Supplementary Fig.5**
