# Supplementary material
Source: Research Square preprint supplement (doi:10.21203/rs.3.rs-9543837/v1)
Supplement: Supplementary file 2 [file dd19bdc4b57f9dfeda8faa35.xlsx]

## Sheet: Fig. 1
			Fig. 1d
				Kosakonia sp. strain CCTCC M2018092	Kosakonia cowanii JCM10956	Salmonella enterica LT12	Enterobacter cloacae ATCC13047	Escherichia coli str. K12 substr. MG1655	Cronobacter sakazakii ATCC29544
			manA	1	1	1	1	1	1
			manB	2	1	1	1	1	1
			manC	3	1	1	1	1	1
			gmd	2	1	1	1	1	1
			fcl	2	1	1	1	1	1
			Fig. 1e
				Colanic acid pathway			Rhamnose pathway
			manB	0.00260771	0.00269967	0.00371351	0.246046	0.247757	0.252963
			manC	0.0137636	0.0138593	0.0117353	0.125608	0.134623	0.119659
			gmd	0.0237983	0.0267744	0.0267744	0.145289	0.151459	0.145289
			fcl	0.0082408	0.00742702	0.00633254	0.315782	0.298748	0.302918

## Sheet: Fig. 2
		Fig. 2b								Fig. 2e
			OD600								OD600			2´-FL (g/L)
		Glucose	53.27	54.08	53.5					22 ℃	18.73	17.62	21.35	0.14	0.15	0.18
		Fructose	49.2	48.11	48.71					25 ℃	32.57	35.4	33.63	0.36	0.31	0.39
		Sucrose	57.55	58.6	58.64					30 ℃	51.26	47.56	49.2	0.67	0.64	0.61
		Glycerol	52.67	51.4	52.49
										Fig. 2f
		Fig. 2c									NADPH / OD600 (nmol)
		Lactose (g/L)	OD600							Glucose	0.35	0.39	0.37
		0	49.58	50.37	49.25					Fructose	0.22	0.22	0.21
		4	48.61	48.5	49.86					Sucrose	0.26	0.25	0.24
		8	48.8	47.13	47.18					Glycerol	0.18	0.19	0.18
		12	44.38	43.95	45.52
		20	43.6	43.75	44.1
		Fig. 2d
			OD600			2´-FL (g/L)
		Glucose	51.05	49.93	50.28	0	0	0
		Fructose	46.42	44.69	45.2	0.5	0.51	0.53
		Sucrose	47.7	49.72	49.31	0.57	0.59	0.57
		Glycerol	49.25	48.55	48.19	0.62	0.58	0.6

## Sheet: Fig. 3
		Fig. 3c										Fig. 3f									Fig. 3h
			OD600			2´-FL (g/L)							OD600			2´-FL (g/L)						2´-FL (g/L)
		K03	52.83	50.66	48.36	0	0	0				K05	27.84	27.2	29.36	6.13	6.21	6.34			K12 (MBP-114)	11.68	12.5	12.09
		K04	32.14	33.56	35.48	0.75	0.72	0.76				K06	26.48	24.54	26.5	6.15	5.91	6.1			K12 (MBP-105)	5.78	6.42	6.3
												K07	30.28	29.67	27.48	6.24	6.32	6.14			K12 (MBP-108)	7.39	6.94	7.83
												K08	24.18	23.5	24.55	5.83	5.7	5.9			K12 (Infb-105)	13.37	14	14.27
		Fig. 3d										K09	32.52	29.9	31.82	6.92	6.83	7.04			K12 (Infb-108)	13.82	14.48	15.15
		Glucose (g/L)	OD600			2´-FL (g/L)						K10	34.85	33.4	32.61	6.45	6.55	6.35
		10	15.24	12.43	18.37	0.51	0.44	0.58				K11	19.64	18.7	19.27	9.59	9.76	9.88
		20	39.22	36.18	35.57	0.71	0.76	0.73				K12	33.76	32.62	32.5	12.37	12.26	12.14			Fig. 3i
		40	66.83	68.4	67.94	0.94	0.89	0.97														OD600			2´-FL (g/L)
		60	56.62	54	52.46	1.34	1.21	1.27													K12	31.6	28.47	27.53	13.3	12.54	11.96
		80	58.41	51.65	54.6	1.16	1.05	1.14				Fig. 3g									K15	26.77	27.82	25.79	11.24	12.16	11.32
													2´-FL (g/L)								K12 (+NADPH)	28.36	30.25	29.64	11.85	12.29	12.42
												K12	11.25	11.88	12.3
		Fig. 3e										K13	12.74	13.45	13.28
			OD600			2´-FL (g/L)						K14	14.68	13.92	14.4
		K04	52.31	51.75	50.14	1.28	1.22	1.17
		K05	49.85	50.4	53.62	1.49	1.37	1.61				Time (h)	K12	K13	K14
		K05 (PJ23)	29.54	31.5	28.96	6.2	6.35	6.18				0	0.39	0.43	0.47
												8	6.7	4.7	2.57
												16	28.8	24.5	19.3
												24	29	28.67	25.7
												32	29.2	29.14	29.24

## Sheet: Fig. 4
		Fig. 4f
			OD600			2´-FL (g/L)
		K12	28.21	29.4	26.53	12.82	12.16	11.9
		K16	28.15	28.82	30.72	24.2	25.46	24.68
		Fig. 4h
			OD600			2´-FL (g/L)			Glucose (g/L)
		K12	27.61	28.55	28.1	13.27	12.88	13.05	0	0	0
		K17	8.24	7.28	7.56	1.79	1.87	1.82	48.53	46.29	48.15
		K17 (CaCO3)	17.95	18.81	18.52	12.57	12.32	11.94	18.22	19.52	20.17

## Sheet: Fig. 5
		Fig. 5b
			OD600			2´-FL (g/L)			Glucose (g/L)
		K16	25.66	27.57	24.67	23.45	23.82	22.4	0	0	0
		K18	15.17	14.29	16.8	15.02	16.22	14.56	11.46	12.7	10.48
		Fig. 5c	OD600			Fig. 5d	2´-FL (g/L)			Fig. 5e	Glucose (g/L)
		Time (h)	K16	K18		Time (h)	K16	K18		Time	K16	K18
		0	0.07	0.37		0	0	0		0	62.4	60.18
		8	2.58	1.12		8	0.28	0.32		8	38.5	42.54
		16	8.7	4.53		16	3.44	2.14		16	28.81	34.36
		24	17.23	8.63		24	7.69	3.23		24	21.23	31.61
		48	19.39	10.97		48	14.25	8.72		48	12.64	26.93
		72	24.83	16.34		72	23.19	15.6		72	0	13.79
		Fig. 5f
			OD600			2´-FL (g/L)			Glucose (g/L)
		K19	13.62	16.4	16.55	17.8	17.12	18.37	8.85	11.6	12.74
		K20	21.92	19.41	20.47	29.68	28.21	31.04	0	0	0
		Fig. 5g	OD600			Fig. 5h	2´-FL (g/L)			Fig. 5i	Glucose (g/L)
		Time (h)	K19	K20		Time (h)	K19	K20		Time (h)	K19	K20
		0	0.11	0.24		0	0	0		0	59.5	60.23
		8	0.88	4.32		8	0.42	3.26		8	45.3	37.7
		16	5.21	9.49		16	1.75	6.94		16	38.29	23.67
		24	7.71	15.62		24	4.61	11.85		24	32.46	13.09
		48	10.97	17.33		48	8.57	22.7		48	24.73	8.28
		72	14.38	20.27		72	14.29	29.36		72	15.92	0

## Sheet: Fig. 6
		Fig. 6b
		Time (h)	OD600			2´-FL (g/L)			Residual glucose (g/L)
		0	0.72	2.15	1.3	0	0	0	45.17	42.93	44.05
		4	3.21	2.29	4.07	2.57	1.34	2.15	38.24	37.81	35.07
		8	8.11	4.12	7.35	4.76	3.12	6.34	32.16	29.74	28.18
		12	11.42	13.84	9.67	8.41	6.09	10.26	24.38	15.59	20.79
		20	14.3	18.52	13.75	15.37	9.85	12.74	13.82	5.91	11.24
		28	29.06	25.64	27.16	25.04	20.16	28.49	9.68	8.01	4.89
		36	35.57	31.59	28.2	37.69	32.31	41.82	7.92	4.63	7.27
		48	33.26	42.54	34.61	47.84	42.29	55.17	8.12	7.29	12.91
		60	48.7	47.8	40.9	62.53	69.16	75.04	2.8	3.59	5.32
		72	57.92	64.72	50.18	81.62	92.48	88.13	9.97	6.23	4.35
		84	61.3	58.62	66.5	103.25	116.82	114.41	8.59	10.19	6.76
		96	67.49	71.2	74.32	128.79	138.34	132.26	3.76	8.6	13.25
		108	70.36	68.42	82.13	144	147.5	152.29	7.3	6.2	11.63
		Fig. 6c
		Time (h)	OD600			3-FL (g/L)			Residual glucose (g/L)
		0	0.82	0.64	0.7	0	0	0	42	45.38	39.53
		4	1.61	1.37	1.85	0.79	0.71	1.05	36.59	41.1	34.35
		8	4.45	3.78	5.12	1.58	2.89	2.4	31.06	35.39	27.18
		12	6.9	5.87	7.34	2.37	3.6	3.13	26.33	28.3	22.75
		20	12.81	10.89	14.73	7.16	5.54	7.92	15.26	13.12	17.51
		28	18.65	15.82	21.4	11.96	10.76	13.16	10.5	11.78	14.45
		36	27.86	23.68	32.54	18.74	20.85	18.6	5.85	10.83	6.58
		48	32.49	27.62	37.36	28.54	25.69	24.59	8.23	4.16	10.46
		60	41.72	35.46	45.98	36.3	28.88	29.27	16.71	15.22	13.26
		72	46.47	42.87	42.01	42.52	36.8	38.11	11.49	7.04	9.32
		84	55.15	46.92	57.42	48.91	44.93	46.14	20.86	12.5	11.33
		96	58.21	52.09	63.07	52.7	47.8	51.2	10.96	7.83	4.7
		108	62.75	60.17	59.37	60.45	54.39	56.88	8.38	10.26	5.72

## Sheet: Fig. S3
		Fig. S3a
		Time (h)	OD600			2´-FL (g/L)			Residual glucose (g/L)
		0	0.16	0.11	0.2	0	0	0	60.4	64.53	61.46
		4	1.76	3.15	1.19	0.3	0.13	0.22	55	58.9	52.75
		8	5.87	5.32	7.63	0.72	0.8	0.62	51.62	54.01	45.67
		12	7.46	8.58	5.6	1.38	1.52	2.35	42.8	48.87	38.95
		20	5.53	9.28	5.46	4.95	2.3	3.52	39.24	33.61	34.77
		28	5.36	7.23	6.31	5.39	3.89	4.45	35.4	31.18	32.21
		36	6.21	5.9	7.82	5.43	4.47	5.18	34.18	29.42	33.49
		Fig. S3b
		Time (h)	OD600			2´-FL (g/L)			Residual glucose (g/L)
		0	0.47	0.23	0.37	0	0	0	62.76	56.89	63.74
		4	3.15	2.09	2.92	0.45	0.43	0.56	53.38	48.97	58.2
		8	6.42	7.76	5.61	0.92	1.53	0.85	46.25	41.82	50.7
		12	12.58	9.13	10.72	2.81	3.39	2.54	32.33	36.41	38.16
		20	9.97	9.69	11.06	6.34	5.82	4.71	24.54	29.87	30.64
		28	7.63	10.5	8.27	8.74	6.36	8.43	18.37	20.18	25.57
		36	6.5	8.57	6.65	9.46	8.31	8.84	18.05	21.45	23.12
		Fig. S3c
		Time (h)	OD600			2´-FL (g/L)			Residual glucose (g/L)
		0	0.62	0.38	0.5	0	0	0	59.53	62.2	65.05
		4	4.96	5.15	5.8	0.63	0.57	0.36	49.25	56.12	55.3
		8	7.74	10.72	8.98	1.5	1.79	2.03	38.57	42.13	43.48
		12	15.4	13.94	11.5	2.49	3.26	3.98	26.32	28.29	32.9
		20	9.16	11.14	8.93	5.47	6.59	4.83	18.65	16.4	22.52
		28	8.62	7.56	9.78	6.44	5.81	5.6	15.39	17.75	20.36
		36	8.23	10.33	9.69	6.52	7.42	5.14	13.76	15.54	17.84

## Sheet: Fig. S4
		Fig. S4a
		Time (h)	OD600			2´-FL (g/L)			Residual glucose (g/L)
		0	0.94	0.85	1.33	0	0	0	61.33	67.4	58.25
		4	3.76	2.41	3.98	0.38	0.52	0.42	59.88	64.5	56.9
		8	19.28	20.85	18.92	3.24	3.48	4.05	54.6	51.8	49.25
		12	24.65	26.9	23.35	9.6	11.35	9.82	38.3	42.9	35.81
		20	29.78	31.83	30.15	17.6	15.64	14.9	19.26	17.55	21.27
		28	27.66	25.8	27.52	20.15	18.8	19.2	15.3	16.85	14.2
		36	25.4	29.35	26.85	23.95	22.51	21.58	13.87	11.7	13.25
		48	49.28	46.22	50.96	25.2	24.9	22.05	11.28	10.18	12.3
		60	53.67	56.82	54.16	26.68	25.27	23.62	5.83	7.45	9.2
		72	45.25	42.7	44.9	26.81	27.5	24.53	3.1	5.9	6.85
		Fig. S4b
		Time (h)	OD600			2´-FL (g/L)			Residual glucose (g/L)
		0	0.34	0.38	0.3	0	0	0	63.4	69.2	58.5
		4	5.4	5.9	4.95	0.59	0.67	0.41	57.41	62.15	51.67
		8	13.47	15.2	12.85	3.67	4.18	3.2	49.46	55.86	44.2
		12	16.44	14.95	18.6	6.26	7.4	4.54	40.27	39.5	30.56
		20	24.58	27.4	23.65	10.09	8.61	12.6	65.9	71.26	60.7
		28	17.74	16.15	19.62	16.25	18.33	15.35	36.18	48.5	32.08
		36	19.83	21.52	18.35	19.51	17.2	22.59	66.49	62.95	63.84
		48	30.61	34.28	28.48	24.67	27.9	21.86	42.62	44.23	48.53
		60	28.49	26.83	32.5	30.18	28.72	32.2	31.94	36.5	28.34
		72	29.38	33.46	28.16	32.37	34.57	36.29	14.77	16.87	13.3
		Fig. S4c
		Time (h)	OD600			2´-FL (g/L)			Residual glucose (g/L)
		0	1.2	1.46	1.15	0	0	0	66.25	71.5	64.1
		4	7.5	8.59	6.65	0.84	0.96	0.73	62.74	67.31	56.48
		8	11.6	10.25	13.6	2.62	2.07	2.3	58.2	62.4	52.07
		12	12.88	14.4	11.35	4.68	5.31	4.52	54.5	52.16	48.8
		20	36.75	41.2	32.8	14.93	13.6	17.14	65.61	61.24	69.5
		28	41.15	36.28	46.3	24.91	28.95	22.94	28.54	25.73	28.62
		36	28.36	31.95	25.21	31.67	27.8	35.19	68.3	66.8	59.5
		48	32.11	28.42	35.9	38.18	43.19	33.8	14.06	16.5	12.72
		60	23.5	26.23	21.02	53.85	52.4	56.29	25.71	29.87	22.64
		72	16.53	20.6	18.4	58.25	60.84	61.35	10.97	7.54	9.2
